# Supplementary material for: Hypersilylated cyclodiphosphadiazanes and cyclodiphosphadiazenium salts
Source: Royal Society of Chemistry journal article supplement (doi:10.1039/b911326f), 2009-01-01
Supplement: b911326f.pdf [file b911326f.pdf]

## Hypersilylated Cyclodiphosphadiazanes and Cyclodiphosphadiazanium Salts

*René Kuzora, Axel Schulz,\* Alexander Villinger and Ronald Wustrack*

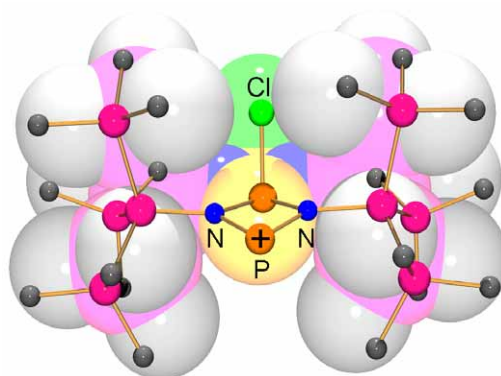

### This file includes:

|                          |       |
|--------------------------|-------|
| 1. Experimental          | p. 2  |
| 2. Structure Elucidation | p. 3  |
| 3. Synthesis of <b>4</b> | p. 13 |
| 4. Synthesis of <b>5</b> | p. 14 |
| 5. Synthesis of <b>6</b> | p. 15 |
| 6. Synthesis of <b>7</b> | p. 16 |
| 7. Literature            | p. 17 |

## 1. Experimental

**General Information.** All manipulations were carried out under oxygen- and moisture-free conditions under argon using standard Schlenk or drybox techniques.

Dichloromethane was purified according to a literature procedure,<sup>[1]</sup> dried over P<sub>4</sub>O<sub>10</sub> and freshly distilled prior to use. *N*-hexane was dried over Na/Benzophenone/Tetraglyme and freshly distilled prior to use. THF was dried over Na/Benzophenone and freshly distilled prior to use. Toluene was dried over Na/K/Benzophenone and freshly distilled prior to use. Tris-(trimethylsilyl)silyl-amine was prepared according to a literature procedure.<sup>[2]</sup> Triethylamine (98%, Merck) and PCl<sub>3</sub> (99.9%, Acros) were freshly distilled prior to use. GaCl<sub>3</sub> (99.999%, Sigma-Aldrich), Silvertriflourmethanesulfonate (98%, Fluka) and *n*-BuLi (2.5M, Acros) were used as recieved.

**NMR:** <sup>31</sup>P{<sup>1</sup>H}, <sup>29</sup>Si-INEPT, <sup>19</sup>F{<sup>1</sup>H}, <sup>13</sup>C{<sup>1</sup>H}, <sup>13</sup>C-DEPT and <sup>1</sup>H-NMR spectra were obtained on a Bruker AVANCE 300, 400 or 500 spectrometer and were referenced internally to the deuterated solvent (<sup>13</sup>C, CD<sub>2</sub>Cl<sub>2</sub>: δ<sub>reference</sub> = 54 ppm, C<sub>6</sub>D<sub>6</sub>: δ<sub>reference</sub> = 128 ppm) or to protic impurities in the deuterated solvent (<sup>1</sup>H, CDHCl<sub>2</sub>: δ<sub>reference</sub> = 5.31 ppm, C<sub>6</sub>D<sub>5</sub>H: δ<sub>reference</sub> = 7.16 ppm). C<sub>6</sub>D<sub>6</sub> was dried over Na/benzophenone, CD<sub>2</sub>Cl<sub>2</sub> was dried as depicted above for the undeuterated solvent.

**IR:** Nicolet 6700 FT-IR spectrometer with a Smart Endurance ATR device or Nicolet 380 FTIR with Smart Orbit ATR module.

**Raman:** Bruker VERTEX 70 FT-IR with RAM II FT-Raman module, equipped with a Nd:YAG laser (1064nm).

**MS:** Finnigan MAT 95-XP from Thermo Electron.

**CHN analyses:** Analysator Flash EA 1112 from Thermo Quest.

**Melting points** are uncorrected (EZ-Melt, Stanford Research Systems). Heating-rate 20 °C/min (clearing-points are reported).

**DSC:** DSC 823e from Mettler-Toledo, Heating-rate 20 °C/min.

## 2. Structure elucidation

**X-ray Structure Determination:** X-ray quality crystals of **5**, **6** and **7** were selected in Fomblin-YR1800 oil (Alfa Aesar) at ambient temperatures, X-ray quality crystals of **4** and **8** were selected in Galden-HT230 oil (Solvay Solexis) at 200 K. All samples were cooled to 173(2) K during measurement. The data were collected on a Bruker-Nonius Apex X8 CCD diffractometer using graphite-monochromated Mo K $\alpha$  radiation ( $\lambda = 0.71073$ ). The structures were solved by direct methods (*SHELXS-97*)<sup>[3]</sup> and refined by full-matrix least squares procedures (*SHELXL-97*).<sup>[4]</sup> Semi-empirical absorption corrections were applied (SADABS).<sup>[5]</sup> All non hydrogen atoms were refined anisotropically, hydrogen atoms were included in the refinement at calculated positions using a riding model.

The P(SO<sub>3</sub>CF<sub>3</sub>)-Fragment in molecule **6** was disordered and was split in two parts. The occupancy of each part was refined freely (0.833(2)/0.167(2)). The N<sub>2</sub>P<sub>2</sub>Cl<sup>+</sup>-unit in **7** was disordered. The position of the P-atoms and the Cl-atom was split in two parts. The occupancy of each part was refined freely (0.853(8)/ 0.147(8)). The Dichloromethane molecule in **7** was disordered. The position of the Cl-atoms was split in two parts. The occupancy of each part was refined freely (0.57(10)/ 0.43(10)).

Several samples of **5** have been measured, which all gave the same result. **5** crystallizes in the cubic spacegroup P2<sub>1</sub>3 ( $a = 15.8101(2)$  Å,  $V = 3951.88(9)$  Å<sup>3</sup>) with four molecules in the unit cell. The molecules lie along the crystallographic three-fold axis and are found to be disordered over two positions, which results in a heavy disorder which could not be modelled satisfactorily.

**Table S1.** Crystallographic Details of **4**, **6** and **7**

|                                                    | <b>4</b>                                                         | <b>6</b>                                                                                                       | <b>7</b>                                                                           |
|----------------------------------------------------|------------------------------------------------------------------|----------------------------------------------------------------------------------------------------------------|------------------------------------------------------------------------------------|
| Chem. Formula                                      | C <sub>9</sub> H <sub>28</sub> Cl <sub>2</sub> NPSi <sub>4</sub> | C <sub>19</sub> H <sub>54</sub> ClF <sub>3</sub> N <sub>2</sub> O <sub>3</sub> P <sub>2</sub> SSi <sub>8</sub> | C <sub>19</sub> H <sub>56</sub> Cl <sub>7</sub> GaN <sub>2</sub> P <sub>2</sub> Si |
| Form. Wght. [g mol <sup>-1</sup> ]                 | 364.55                                                           | 769.81                                                                                                         | 917.19                                                                             |
| Colour                                             | Colourless                                                       | Colourless                                                                                                     | Red                                                                                |
| Cryst. system                                      | Monoclinic                                                       | Monoclinic                                                                                                     | Monoclinic                                                                         |
| Space group                                        | C2/c                                                             | P2 <sub>1</sub> /c                                                                                             | P2 <sub>1</sub> /c                                                                 |
| <i>a</i> [Å]                                       | 15.513(3)                                                        | 18.508(4)                                                                                                      | 14.5675(16)                                                                        |
| <i>b</i> [Å]                                       | 9.906(2)                                                         | 13.008(3)                                                                                                      | 12.0572(16)                                                                        |
| <i>c</i> [Å]                                       | 27.600(6)                                                        | 18.329(4)                                                                                                      | 27.204(4)                                                                          |
| $\alpha$ [°]                                       | 90.00                                                            | 90.00                                                                                                          | 90.00                                                                              |
| $\beta$ [°]                                        | 90.80(3)                                                         | 108.40(3)                                                                                                      | 101.975(3)                                                                         |
| $\gamma$ [°]                                       | 90.00                                                            | 90.00                                                                                                          | 90.00                                                                              |
| <i>V</i> [Å <sup>3</sup> ]                         | 4240.9(15)                                                       | 4187.2(15)                                                                                                     | 4674.2(11)                                                                         |
| <i>Z</i>                                           | 8                                                                | 4                                                                                                              | 4                                                                                  |
| $\rho_{\text{calc.}}$ [g cm <sup>-3</sup> ]        | 1.142                                                            | 1.221                                                                                                          | 1.303                                                                              |
| $\mu$ [mm <sup>-1</sup> ]                          | 0.594                                                            | 0.483                                                                                                          | 1.278                                                                              |
| $\lambda_{\text{MoK}\alpha}$ [Å]                   | 0.71073                                                          | 0.71073                                                                                                        | 0.71073                                                                            |
| <i>T</i> [K]                                       | 173 (2)                                                          | 173 (2)                                                                                                        | 173 (2)                                                                            |
| Measured reflections                               | 27606                                                            | 70840                                                                                                          | 37008                                                                              |
| Independent reflections                            | 6166                                                             | 12191                                                                                                          | 8045                                                                               |
| Reflections with $I > 2\sigma(I)$                  | 4528                                                             | 10111                                                                                                          | 6624                                                                               |
| <i>R</i> <sub>int.</sub>                           | 0.0265                                                           | 0.0242                                                                                                         | 0.0471                                                                             |
| <i>F</i> (000)                                     | 1552                                                             | 1632                                                                                                           | 1904                                                                               |
| <i>R</i> <sub>1</sub> (R [ $F^2 > 2\sigma(F^2)$ ]) | 0.0399                                                           | 0.0494                                                                                                         | 0.0849                                                                             |
| w <i>R</i> <sub>2</sub> ( $F^2$ )                  | 0.1048                                                           | 0.1371                                                                                                         | 0.2428                                                                             |
| GooF                                               | 1.044                                                            | 1.047                                                                                                          | 1.032                                                                              |
| Parameters                                         | 167                                                              | 434                                                                                                            | 418                                                                                |
| CCDC #                                             |                                                                  |                                                                                                                |                                                                                    |

**Table S2.** Crystallographic Details of tris(trimethylsilyl)chlorosilane.

---

|                                                                                  | tris(trimethylsilyl)chlorosilane ( <b>8</b> )    |
|----------------------------------------------------------------------------------|--------------------------------------------------|
| Chem. Formula                                                                    | C <sub>9</sub> H <sub>27</sub> ClSi <sub>4</sub> |
| Form. Wght. [g mol <sup>-1</sup> ]                                               | 283.12                                           |
| Colour                                                                           | Colourless                                       |
| Cryst. system                                                                    | Cubic                                            |
| Space group                                                                      | Pa-3                                             |
| <i>a</i> [Å]                                                                     | 15.467(3)                                        |
| <i>b</i> [Å]                                                                     | 15.467(3)                                        |
| <i>c</i> [Å]                                                                     | 15.467(3)                                        |
| <i>α</i> [°]                                                                     | 90.00                                            |
| <i>β</i> [°]                                                                     | 90.00                                            |
| <i>γ</i> [°]                                                                     | 90.00                                            |
| <i>V</i> [Å <sup>3</sup> ]                                                       | 3700.3(12)                                       |
| <i>Z</i>                                                                         | 8                                                |
| <i>ρ</i> <sub>calc.</sub> [g cm <sup>-3</sup> ]                                  | 1.016                                            |
| <i>μ</i> [mm <sup>-1</sup> ]                                                     | 0.441                                            |
| <i>λ</i> <sub>MoKα</sub> [Å]                                                     | 0.71073                                          |
| <i>T</i> [K]                                                                     | 173 (2)                                          |
| Measured reflections                                                             | 7244                                             |
| Independent reflections                                                          | 1628                                             |
| Reflections with <i>I</i> > 2σ( <i>I</i> )                                       | 1198                                             |
| <i>R</i> <sub>int.</sub>                                                         | 0.0311                                           |
| <i>F</i> (000)                                                                   | 1232                                             |
| <i>R</i> <sub>1</sub> (R [ <i>F</i> <sup>2</sup> > 2σ( <i>F</i> <sup>2</sup> )]) | 0.0349                                           |
| <i>wR</i> <sub>2</sub> ( <i>F</i> <sup>2</sup> )                                 | 0.0903                                           |
| GooF                                                                             | 1.026                                            |
| Parameters                                                                       | 46                                               |
| CCDC #                                                                           |                                                  |

---

**Scheme S1.** Numbering scheme of **4**.

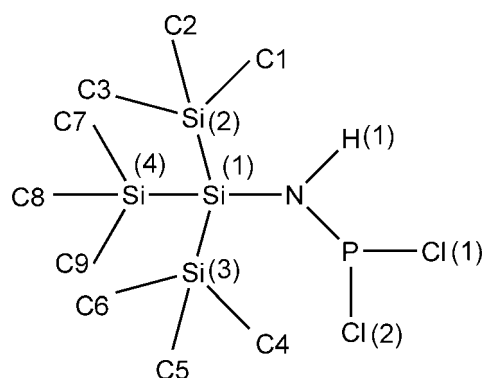

**Table S3.** Selected bond lengths (Å), angles and torsion angles (°) of **4**.

|          |             |              |              |
|----------|-------------|--------------|--------------|
| N—P      | 1.6223 (16) | N—P—Cl2      | 102.36 (8)   |
| N—Si1    | 1.7888 (16) | N—P—Cl1      | 103.07 (7)   |
| N—H1     | 0.69 (2)    | Cl2—P—Cl1    | 95.97 (4)    |
| P—Cl1    | 2.1008 (9)  | N—Si1—Si2    | 106.91 (7)   |
| P—Cl2    | 2.0765 (10) | N—Si1—Si4    | 105.47 (6)   |
| Si1—Si2  | 2.3489 (7)  | Si2—Si1—Si4  | 111.11 (3)   |
| Si1—Si3  | 2.3583 (8)  | N—Si1—Si3    | 110.09 (6)   |
| Si1—Si4  | 2.3497 (9)  | Si2—Si1—Si3  | 110.91 (3)   |
| Si2—C1   | 1.870 (2)   | Si4—Si1—Si3  | 112.08 (2)   |
| Si2—C2   | 1.865 (2)   | Si1—N—P—Cl2  | -135.02 (12) |
| Si2—C3   | 1.872 (2)   | Si1—N—P—Cl1  | 125.77 (12)  |
| Si3—C4   | 1.865 (2)   | P—N—Si1—Si2  | -115.89 (13) |
| Si3—C5   | 1.876 (2)   | P—N—Si1—Si4  | 125.77 (12)  |
| Si3—C6   | 1.869 (2)   | P—N—Si1—Si3  | 4.67 (16)    |
| Si4—C7   | 1.863 (2)   | N—Si1—Si2—C2 | 46.43 (11)   |
| Si4—C8   | 1.859 (2)   | N—Si1—Si2—C1 | 167.46 (11)  |
| Si4—C9   | 1.859 (3)   | N—Si1—Si3—C6 | 54.07 (11)   |
| P—N—Si1  | 125.98 (10) | N—Si1—Si3—C5 | 172.15 (10)  |
| P—N—H1   | 119.0 (19)  | N—Si1—Si4—C9 | -74.89 (16)  |
| Si1—N—H1 | 114.7 (19)  | N—Si1—Si4—C8 | 45.19 (12)   |

**Scheme S2.** Numbering scheme of **6**.

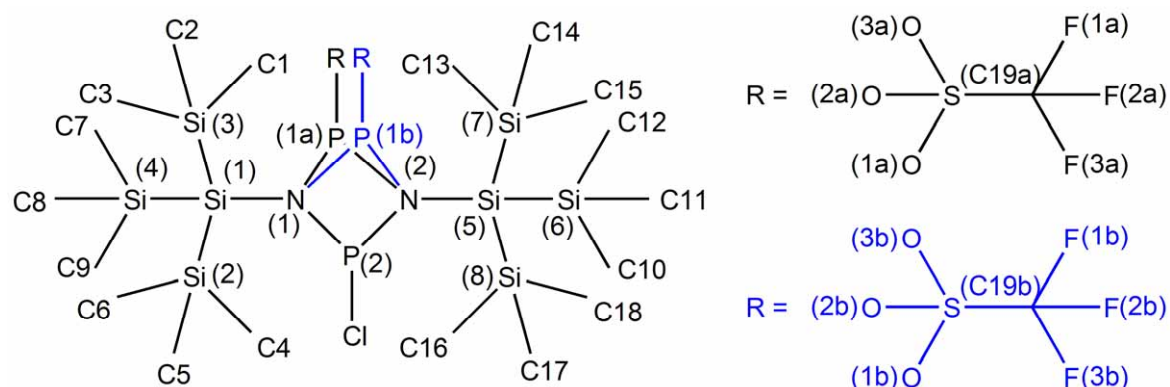

**Table S4.** Selected bond lengths (Å), angles and torsion angles (°) of **6**.

|                 |             |                     |             |
|-----------------|-------------|---------------------|-------------|
| <b>P1A—N2</b>   | 1.689 (2)   | <b>O3B—S1B—C19B</b> | 105.9 (13)  |
| <b>P1A—N1</b>   | 1.698 (2)   | <b>O2B—S1B—C19B</b> | 98.2 (14)   |
| <b>P1A—O1A</b>  | 1.795 (3)   | <b>O1B—S1B—C19B</b> | 100.2 (10)  |
| <b>P1A—P2</b>   | 2.4951 (14) | <b>S1B—O1B—P1B</b>  | 135.7 (9)   |
| <b>S1A—O3A</b>  | 1.414 (2)   | <b>F3B—C19B—F1B</b> | 114 (3)     |
| <b>S1A—O2A</b>  | 1.423 (2)   | <b>F3B—C19B—F2B</b> | 91 (2)      |
| <b>S1A—O1A</b>  | 1.543 (2)   | <b>F1B—C19B—F2B</b> | 109 (2)     |
| <b>S1A—C19A</b> | 1.822 (5)   | <b>F3B—C19B—S1B</b> | 117.2 (16)  |
| <b>C19A—F2A</b> | 1.314 (5)   | <b>F1B—C19B—S1B</b> | 115 (2)     |
| <b>C19A—F3A</b> | 1.319 (6)   | <b>F2B—C19B—S1B</b> | 108 (2)     |
| <b>C19A—F1A</b> | 1.325 (4)   | <b>N1—P2—N2</b>     | 85.17 (8)   |
| <b>P1B—N1</b>   | 1.688 (7)   | <b>N1—P2—Cl</b>     | 102.98 (7)  |
| <b>P1B—O1B</b>  | 1.760 (12)  | <b>N2—P2—Cl</b>     | 105.43 (8)  |
| <b>P1B—N2</b>   | 1.778 (7)   | <b>N1—P2—P1A</b>    | 42.75 (6)   |
| <b>P1B—P2</b>   | 2.503 (7)   | <b>N2—P2—P1A</b>    | 42.42 (6)   |
| <b>S1B—O3B</b>  | 1.409 (17)  | <b>Cl—P2—P1A</b>    | 109.47 (5)  |
| <b>S1B—O2B</b>  | 1.434 (15)  | <b>N1—P2—P1B</b>    | 42.19 (16)  |
| <b>S1B—O1B</b>  | 1.447 (13)  | <b>N2—P2—P1B</b>    | 45.24 (16)  |
| <b>S1B—C19B</b> | 1.75 (2)    | <b>Cl—P2—P1B</b>    | 120.37 (14) |

|                     |             |                       |              |
|---------------------|-------------|-----------------------|--------------|
| <b>C19B—F3B</b>     | 1.28 (3)    | <b>P1B—N1—P2</b>      | 95.1 (2)     |
| <b>C19B—F1B</b>     | 1.35 (3)    | <b>P1A—N1—P2</b>      | 94.34 (9)    |
| <b>C19B—F2B</b>     | 1.44 (4)    | <b>P1B—N1—Si1</b>     | 126.9 (2)    |
| <b>P2—N1</b>        | 1.7037 (17) | <b>P1A—N1—Si1</b>     | 134.38 (11)  |
| <b>P2—N2</b>        | 1.7075 (17) | <b>P2—N1—Si1</b>      | 128.98 (10)  |
| <b>P2—Cl</b>        | 2.0916 (10) | <b>P1A—N2—P2</b>      | 94.56 (9)    |
| <b>N1—Si1</b>       | 1.7980 (17) | <b>P2—N2—P1B</b>      | 91.8 (2)     |
| <b>N2—Si5</b>       | 1.8124 (17) | <b>P1A—N2—Si5</b>     | 132.22 (11)  |
| <b>Si1—Si2</b>      | 2.3568 (12) | <b>P2—N2—Si5</b>      | 125.26 (10)  |
| <b>Si1—Si3</b>      | 2.3595 (9)  | <b>P1B—N2—Si5</b>     | 124.9 (2)    |
| <b>Si1—Si4</b>      | 2.3647 (9)  | <b>N1—Si1—Si2</b>     | 109.66 (7)   |
| <b>Si5—Si6</b>      | 2.3532 (9)  | <b>N1—Si1—Si3</b>     | 105.93 (6)   |
| <b>Si5—Si8</b>      | 2.3536 (11) | <b>Si2—Si1—Si3</b>    | 109.48 (3)   |
| <b>Si5—Si7</b>      | 2.3629 (9)  | <b>N1—Si1—Si4</b>     | 110.56 (6)   |
| <b>N2—P1A—N1</b>    | 85.93 (10)  | <b>Si2—Si1—Si4</b>    | 109.02 (3)   |
| <b>N2—P1A—O1A</b>   | 102.11 (12) | <b>Si3—Si1—Si4</b>    | 112.14 (4)   |
| <b>N1—P1A—O1A</b>   | 98.49 (11)  | <b>N2—P1A—O1A—S1A</b> | 104.26 (19)  |
| <b>N2—P1A—P2</b>    | 43.01 (6)   | <b>N1—P1A—O1A—S1A</b> | -168.12 (17) |
| <b>N1—P1A—P2</b>    | 42.91 (6)   | <b>N1—P1B—O1B—S1B</b> | 49.2 (12)    |
| <b>O1A—P1A—P2</b>   | 104.14 (9)  | <b>N2—P1B—O1B—S1B</b> | -35.1 (12)   |
| <b>O3A—S1A—O2A</b>  | 121.24 (16) | <b>P2—P1B—O1B—S1B</b> | 7.5 (13)     |
| <b>O3A—S1A—O1A</b>  | 110.65 (17) | <b>N2—P1A—P2—N1</b>   | 179.98 (14)  |
| <b>O2A—S1A—O1A</b>  | 111.23 (15) | <b>O1A—P1A—P2—N1</b>  | 87.28 (13)   |
| <b>O3A—S1A—C19A</b> | 104.94 (16) | <b>N1—P1A—P2—N2</b>   | -179.98 (14) |
| <b>O2A—S1A—C19A</b> | 105.76 (18) | <b>O1A—P1A—P2—N2</b>  | -92.70 (13)  |
| <b>O1A—S1A—C19A</b> | 100.59 (14) | <b>N2—P1A—P2—Cl</b>   | 91.79 (10)   |
| <b>S1A—O1A—P1A</b>  | 125.00 (15) | <b>N1—P1A—P2—Cl</b>   | -88.19 (10)  |
| <b>F2A—C19A—F3A</b> | 107.9 (4)   | <b>N2—P1B—P2—N1</b>   | 156.6 (3)    |
| <b>F2A—C19A—F1A</b> | 109.3 (4)   | <b>O1B—P1B—N1—P2</b>  | -113.4 (5)   |
| <b>F3A—C19A—F1A</b> | 108.4 (3)   | <b>N2—P1B—N1—P2</b>   | -15.8 (2)    |
| <b>F2A—C19A—S1A</b> | 111.9 (2)   | <b>N2—P1A—N1—P2</b>   | -0.01 (9)    |



|                     |            |                      |              |
|---------------------|------------|----------------------|--------------|
| <b>F3A—C19A—S1A</b> | 111.5 (3)  | <b>N2—P1A—N1—Si1</b> | -163.16 (16) |
| <b>F1A—C19A—S1A</b> | 107.7 (3)  | <b>N2—P2—N1—P1B</b>  | 16.5 (2)     |
| <b>N1—P1B—O1B</b>   | 96.7 (5)   | <b>Cl—P2—N1—P1B</b>  | 121.2 (2)    |
| <b>N1—P1B—N2</b>    | 83.5 (3)   | <b>N2—P2—N1—P1A</b>  | 0.01 (9)     |
| <b>N1—P1A—O1A</b>   | 98.49 (11) | <b>Cl—P2—N1—P1A</b>  | 104.75 (8)   |
| <b>O1B—P1B—N2</b>   | 98.2 (5)   | <b>N2—P2—N1—Si1</b>  | 164.56 (14)  |
| <b>N1—P1B—P2</b>    | 42.69 (16) | <b>Cl—P2—N1—Si1</b>  | -90.70 (13)  |
| <b>O1B—P1B—P2</b>   | 110.7 (5)  | <b>N1—P1A—N2—P2</b>  | 0.01 (9)     |
| <b>N2—P1B—P2</b>    | 42.99 (15) | <b>N1—P2—N2—P1A</b>  | -0.01 (9)    |
| <b>O3B—S1B—O2B</b>  | 122.5 (12) | <b>Cl—P2—N2—P1A</b>  | -102.16 (8)  |
| <b>O3B—S1B—O1B</b>  | 113.0 (9)  | <b>N1—P2—N2—P1B</b>  | -15.6 (2)    |
| <b>O2B—S1B—O1B</b>  | 112.9 (8)  | <b>Cl—P2—N2—P1B</b>  | -117.7 (2)   |

**Scheme S3.** Numbering scheme of 7.

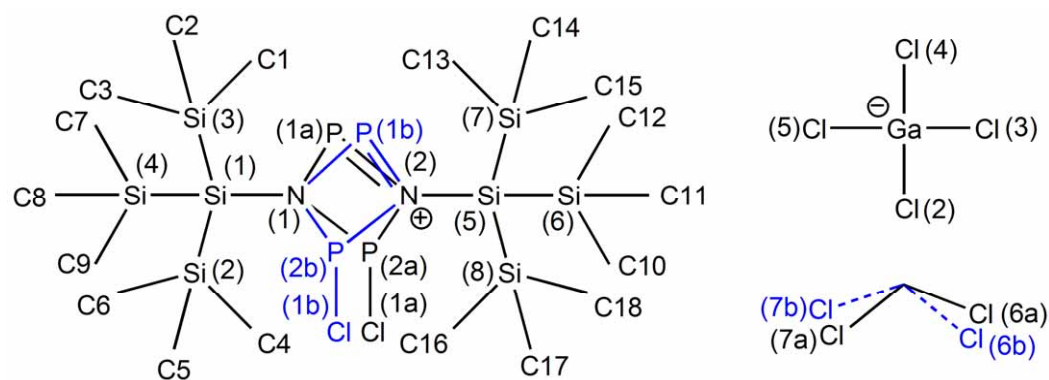

**Table S5.** Selected bond lengths (Å), angles and torsion angles (°) of 7.

|                 |           |                       |             |
|-----------------|-----------|-----------------------|-------------|
| <b>Ga—Cl4</b>   | 2.168 (3) | <b>P1A—N1—Si1</b>     | 134.0 (4)   |
| <b>Ga—Cl5</b>   | 2.171 (3) | <b>P2A—N1—Si1</b>     | 132.7 (4)   |
| <b>Ga—Cl2</b>   | 2.173 (3) | <b>P2B—N1—Si1</b>     | 128.5 (8)   |
| <b>Ga—Cl3</b>   | 2.175 (3) | <b>P1A—N2—P2A</b>     | 92.7 (4)    |
| <b>Cl2—P1B</b>  | 2.56 (5)  | <b>P1B—N2—P2B</b>     | 90.8 (14)   |
| <b>P1A—N1</b>   | 1.648 (7) | <b>P1B—N2—Si5</b>     | 142.2 (12)  |
| <b>P1A—N2</b>   | 1.653 (8) | <b>P1A—N2—Si5</b>     | 134.2 (5)   |
| <b>P1A—P2A</b>  | 2.449 (4) | <b>P2A—N2—Si5</b>     | 132.8 (4)   |
| <b>P2A—N2</b>   | 1.732 (7) | <b>P2B—N2—Si5</b>     | 126.4 (7)   |
| <b>P2A—N1</b>   | 1.737 (7) | <b>N1—Si1—Si4</b>     | 110.3 (2)   |
| <b>P2A—Cl1A</b> | 2.039 (4) | <b>N1—Si1—Si2</b>     | 106.7 (2)   |
| <b>P1B—N2</b>   | 1.53 (3)  | <b>Si4—Si1—Si2</b>    | 113.23 (12) |
| <b>P1B—N1</b>   | 1.54 (3)  | <b>N1—Si1—Si3</b>     | 105.4 (2)   |
| <b>P1B—P2B</b>  | 2.37 (4)  | <b>Si4—Si1—Si3</b>    | 110.21 (12) |
| <b>P2B—N1</b>   | 1.78 (2)  | <b>Si2—Si1—Si3</b>    | 110.60 (12) |
| <b>P2B—N2</b>   | 1.79 (2)  | <b>N2—Si5—Si6</b>     | 107.0 (2)   |
| <b>P2B—Cl1B</b> | 2.03 (6)  | <b>N2—Si5—Si7</b>     | 108.5 (3)   |
| <b>N1—Si1</b>   | 1.837 (7) | <b>N2—P1B—N1—P2B</b>  | 4(3)        |
| <b>N2—Si5</b>   | 1.833 (7) | <b>Cl2—P1B—N1—P2B</b> | 138 (2)     |
| <b>Si1—Si4</b>  | 2.363 (3) | <b>N2—P1B—N1—Si1</b>  | 177.4 (7)   |

|                     |             |                        |            |
|---------------------|-------------|------------------------|------------|
| <b>Si1—Si2</b>      | 2.363 (3)   | <b>Cl2—P1B—N1—Si1</b>  | -49 (4)    |
| <b>Si1—Si3</b>      | 2.369 (3)   | <b>N2—P1A—N1—P2A</b>   | -12.1 (4)  |
| <b>Si5—Si6</b>      | 2.362 (3)   | <b>N2—P1A—N1—Si1</b>   | 176.8 (6)  |
| <b>Si5—Si7</b>      | 2.362 (3)   | <b>N2—P2A—N1—P1A</b>   | 11.6 (4)   |
| <b>Si5—Si8</b>      | 2.366 (3)   | <b>Cl1A—P2A—N1—P1A</b> | 112.1 (3)  |
| <b>Cl4—Ga—Cl5</b>   | 109.51 (15) | <b>N2—P2A—N1—Si1</b>   | -177.1 (6) |
| <b>Cl4—Ga—Cl2</b>   | 109.35 (14) | <b>Cl1A—P2A—N1—Si1</b> | -76.5 (6)  |
| <b>Cl5—Ga—Cl2</b>   | 109.68 (15) | <b>Cl1B—P2B—N1—P1B</b> | -107 (3)   |
| <b>Cl4—Ga—Cl3</b>   | 109.47 (14) | <b>N2—P2B—N1—Si1</b>   | -178.1 (6) |
| <b>Cl5—Ga—Cl3</b>   | 110.85 (16) | <b>Cl1B—P2B—N1—Si1</b> | 79 (2)     |
| <b>Cl2—Ga—Cl3</b>   | 107.96 (14) | <b>Cl2—P1B—N2—P2B</b>  | -136 (2)   |
| <b>Ga—Cl2—P1B</b>   | 139.1 (9)   | <b>N1—P1B—N2—Si5</b>   | -175.0 (8) |
| <b>N1—P1A—N2</b>    | 88.8 (4)    | <b>Cl2—P1B—N2—Si5</b>  | 53 (5)     |
| <b>N2—P2A—N1</b>    | 83.5 (3)    | <b>N1—P1A—N2—P2A</b>   | 12.1 (4)   |
| <b>N2—P2A—Cl1A</b>  | 101.5 (3)   | <b>N1—P1A—N2—Si5</b>   | -173.3 (6) |
| <b>N1—P2A—Cl1A</b>  | 100.4 (3)   | <b>N1—P2A—N2—P1A</b>   | -11.5 (4)  |
| <b>N2—P1B—N1</b>    | 98 (2)      | <b>Cl1A—P2A—N2—P1A</b> | -110.9 (3) |
| <b>N2—P1B—Cl2</b>   | 122 (2)     | <b>N1—P2A—N2—Si5</b>   | 173.7 (6)  |
| <b>N1—P1B—Cl2</b>   | 119 (3)     | <b>Cl1A—P2A—N2—Si5</b> | 74.4 (6)   |
| <b>N1—P2B—N2</b>    | 80.7 (9)    | <b>P1A—P2A—N2—Si5</b>  | -174.7 (8) |
| <b>N1—P2B—Cl1B</b>  | 105 (3)     | <b>N1—P2B—N2—P1B</b>   | 4(2)       |
| <b>N2—P2B—Cl1B</b>  | 105 (2)     | <b>Cl1B—P2B—N2—P1B</b> | 107 (4)    |
| <b>Cl1B—P2B—P1B</b> | 112 (4)     | <b>N1—P2B—N2—Si5</b>   | 176.7 (6)  |
| <b>P1A—N1—P2A</b>   | 92.6 (4)    | <b>Cl1B—P2B—N2—Si5</b> | -80 (3)    |
| <b>P1B—N1—Si1</b>   | 140.4 (13)  | <b>P1B—P2B—N2—Si5</b>  | 173 (2)    |

**Scheme S4.** Numbering scheme of tris(trimethylsilyl)chlorosilane.

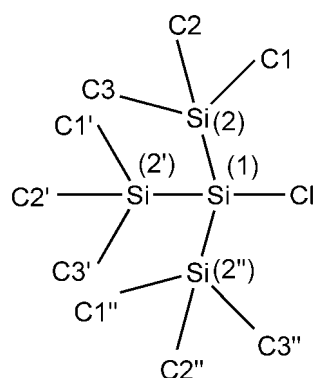

**Table S6.** Selected bond lengths (Å), angles and torsion angles (°) of tris(trimethylsilyl)chlorosilane.

|                           |              |                               |              |
|---------------------------|--------------|-------------------------------|--------------|
| Si1—Cl                    | 2.1248 (9)   | C1—Si2—Si1                    | 110.54 (8)   |
| Si1—Si2 <sup>i</sup>      | 2.3406 (6)   | C3—Si2—Si1                    | 110.36 (7)   |
| Si1—Si2                   | 2.3406 (6)   | C2—Si2—Si1                    | 109.17 (7)   |
| Si1—Si2 <sup>ii</sup>     | 2.3406 (6)   | Cl—Si1—Si2—C1                 | -60.46 (10)  |
| Si2—C1                    | 1.860 (2)    | Si2 <sup>i</sup> —Si1—Si2—C1  | 54.39 (11)   |
| Si2—C3                    | 1.862 (2)    | Si2 <sup>ii</sup> —Si1—Si2—C1 | -175.31 (10) |
| Si2—C2                    | 1.8663 (18)  | Cl—Si1—Si2—C3                 | 57.48 (9)    |
| Cl—Si1—Si2                | 105.508 (18) | Si2 <sup>i</sup> —Si1—Si2—C3  | 172.32 (9)   |
| Si2 <sup>i</sup> —Si1—Si2 | 113.127 (15) | Si2 <sup>ii</sup> —Si1—Si2—C3 | -57.37 (10)  |
| C1—Si2—C3                 | 106.81 (14)  | Cl—Si1—Si2—C2                 | 178.69 (8)   |
| C1—Si2—C2                 | 109.77 (11)  | Si2 <sup>i</sup> —Si1—Si2—C2  | -66.46 (8)   |
| C3—Si2—C2                 | 110.17 (10)  | Si2 <sup>ii</sup> —Si1—Si2—C2 | 63.84 (8)    |

Symmetry codes: (i)  $z, x, y$ ; (ii)  $y, z, x$ .

### 3. Synthesis of *N*-tris(trimethylsilyl)silyl-aminodichlorophosphine (**4**)

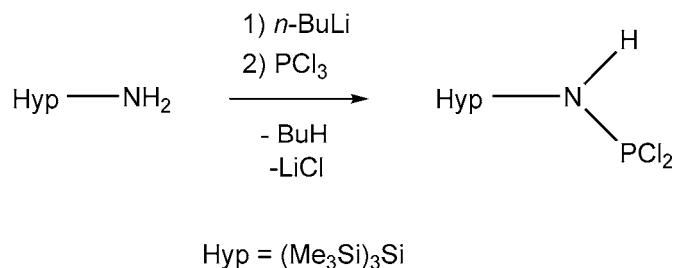

To a stirred solution of Tris(trimethylsilyl)silyl-amine (1,737 g, 6.6 mmol) in *n*-hexane (25 mL), *n*-BuLi (2.24 M, 2.94 mL, 6.6 mmol) was added dropwise at 0 °C over a period of 20 minutes. The resulting colourless solution is warmed to ambient temperatures and stirred for 45 minutes at 25 °C and was then added dropwise to a solution of PCl<sub>3</sub> (1.88 g, 13.75 mmol) in *n*-hexane (25 mL) at -50 °C over a period of 30 minutes. The resulting colourless suspension was stirred for 10 minutes at 0 °C and was then filtered (F4), resulting in a colourless solution. Removal of solvent in vacuo yields 1.68 g (4.6 mmol, 70%) of **4** as colourless, ceraceous solid.

Mp 220 °C (dec.). Anal. calc. % (found): C 29.65 (29.88), H 7.74 (7.46), N 3.84 (3.69), <sup>31</sup>P{<sup>1</sup>H}-NMR (25 °C, C<sub>6</sub>D<sub>6</sub>, 202.5 MHz): δ = 180.3. <sup>29</sup>Si-NMR (25 °C, C<sub>6</sub>D<sub>6</sub>, 99.4 MHz): δ = -34.1 (m, <sup>2</sup>J(<sup>29</sup>Si-<sup>31</sup>P) = 22 Hz, Si(Si(CH<sub>3</sub>)<sub>3</sub>)<sub>3</sub>), -13.9 (m, <sup>3</sup>J(<sup>29</sup>Si-<sup>31</sup>P) = 1,6 Hz, Si(Si(CH<sub>3</sub>)<sub>3</sub>)<sub>3</sub>). <sup>1</sup>H-NMR (25 °C, C<sub>6</sub>D<sub>6</sub>, 500.13 MHz): δ = 0.14 (s, 27 H, <sup>5</sup>J(<sup>1</sup>H-<sup>31</sup>P) = 0.5 Hz, Si(Si(CH<sub>3</sub>)<sub>3</sub>)<sub>3</sub>). <sup>13</sup>C{<sup>1</sup>H}-NMR (25 °C, C<sub>6</sub>D<sub>6</sub>, 125.8 MHz): δ = 0.11 (s, <sup>4</sup>J(<sup>13</sup>C-<sup>31</sup>P) = 2.7 Hz, Si(Si(CH<sub>3</sub>)<sub>3</sub>)<sub>3</sub>). IR (ATR, 25 °C, 32 scans, cm<sup>-1</sup>): = 3334 (w), 2950 (m), 2894 (w), 1440 (w), 1398 (w), 1311 (w), 1245 (s), 1179 (w), 1048 (w), 931 (m), 825 (vs), 744 (m), 689 (s) 621 (s). MS (EI, 70eV); *m/z* (%): 36(13), 38(5), 43(6), 45(12), 49(5), 69(7), 73(100) [Si(CH<sub>3</sub>)<sub>3</sub>]<sup>+</sup>, 74(10), 75(7), 84(6), 86(5), 93(9), 100(9), 116(6), 117(14), 118(5), 119(6), 129(6), 130(12), 131(19), 132(15), 146(9), 147(20), 159(8), 163(5), 166(5), 174(17), 175(5), 204(13), 208(5), 262(24) [NH-Si(Si(CH<sub>3</sub>)<sub>3</sub>)<sub>3</sub>]<sup>+</sup>, 263(8), 264(5), 267(5), 306(7), 208(5), 364(7) [M+H]<sup>+</sup>, 366(6).

Crystals suitable for X-ray crystallographic analysis were obtained, by cooling a saturated *n*-hexane solution of **4** to -80 °C.

## Synthesis of 1,3-dichloro-2,4-bis-tris(trimethylsilyl)silyl-cyclo-diphosphazane (5)

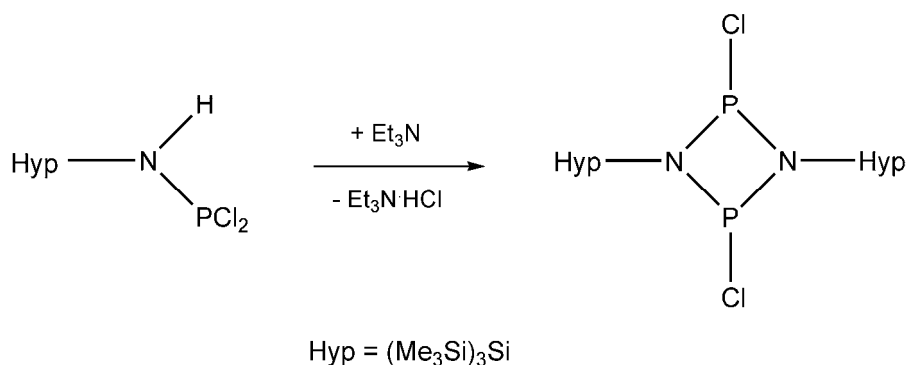

To a stirred solution of *N*-tris(trimethylsilyl)silyl-aminodichlorophosphine (**4**) (4.19 g, 11.5 mmol) in *n*-hexane (40 mL) triethylamine (3.5 mL, 25.0 mmol) was added dropwise at 0 °C over a period of 10 minutes. The resulting colourless suspension is then warmed to ambient temperatures over a period of 30 minutes. The colourless suspension was then filtered (F4), resulting in a colourless, clear solution. Removal of solvent and excess triethylamine *in vacuo* yields a pale yellow solid. Recrystallization from *n*-hexane yields 6.0 g (9.2 mmol, 80 %) of **5** as a colourless, crystalline solid.

Mp 271 °C (dec.). Anal. calc. % (found): C 32.95 (32.72), H 8.29 (8.37), N 4.27 (4.09). <sup>31</sup>P{<sup>1</sup>H}-NMR (25 °C, C<sub>6</sub>D<sub>6</sub>, 202.5 MHz): δ = 257.0. <sup>29</sup>Si-NMR (25 °C, C<sub>6</sub>D<sub>6</sub>, 99.4 MHz): δ = -35.6 (m, Si(Si(CH<sub>3</sub>)<sub>3</sub>)<sub>3</sub>), -13.5 (m, <sup>3</sup>J(<sup>29</sup>Si-<sup>31</sup>P) = 1.3 Hz, Si(Si(CH<sub>3</sub>)<sub>3</sub>)<sub>3</sub>). <sup>1</sup>H-NMR (25 °C, C<sub>6</sub>D<sub>6</sub>, 500.13 MHz): δ = 0.34 (s, 54 H, Si(Si(CH<sub>3</sub>)<sub>3</sub>)<sub>3</sub>). <sup>13</sup>C{<sup>1</sup>H}-NMR (25 °C, C<sub>6</sub>D<sub>6</sub>, 125.8 MHz): δ = 1.14 (s, Si(Si(CH<sub>3</sub>)<sub>3</sub>)<sub>3</sub>). IR (ATR, 25 °C, 32 scans, cm<sup>-1</sup>): = 2948 (m), 2891 (w) 1440 (w), 1397 (w), 1311 (w), 1257 (m), 1243 (s), 1052 (w), 934 (m), 910 (s), 820 (vs), 745 (s), 687 (s) 621 (s). Raman (200 mW, 25 °C, 201 scans, cm<sup>-1</sup>): = 2950 (5), 2892 (10), 691 (1), 630 (5). MS (EI, 70eV); *m/z* (%): 45(5), 73(100) [Si(CH<sub>3</sub>)<sub>3</sub>]<sup>+</sup>, 74(6), 100(15), 130(21), 131(13), 173(5), 204(22), 245(12), 275(8), 292(12), 295(16), 297(7), 581(11) [M-Si(CH<sub>3</sub>)<sub>3</sub>]<sup>+</sup>, 583(11), 641(2) [M-CH<sub>3</sub>]<sup>+</sup>.

## Synthesis of 1-chloro-3-trifluoromethanesulfonato-2,4-bis-tris(trimethylsilyl)silyl-*cyclo*-diphosphadiazane (6)

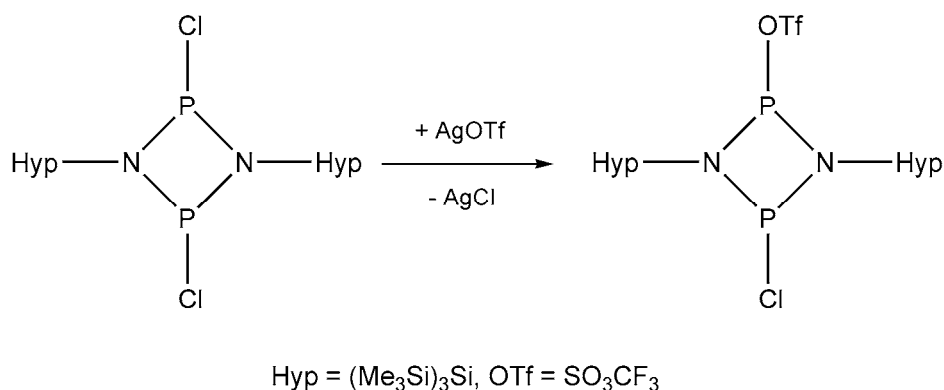

To a stirred solution of 1,3-dichloro-2,4-bis-tris(trimethylsilyl)silyl-*cyclo*-diphosphadiazane (**5**) (0.656 g, 1.0 mmol) in toluene (10 mL), silvertrifluoromethanesulfonate (0.28 g, 1.1 mmol) in toluene (5 mL), was added dropwise at  $-30\text{ }^{\circ}\text{C}$  over a period of 10 minutes. The resulting colourless suspension is then warmed to ambient temperatures over a period of 30 minutes in the dark and was then filtered (F4), resulting in a colourless solution. After removal of solvent *in vacuo* *n*-hexane (10 mL) is added. The resulting colourless suspension was then filtered (F4) a second time, resulting in a colourless solution. Removal of solvent *in vacuo* yields a colourless solid. Recrystallization from *n*-hexane yields 0.46 g (0.6 mmol, 60%) of **6** as a colourless, crystalline solid.

Mp  $106\text{ }^{\circ}\text{C}$  (dec.). Anal. calc. % (found): C 29.65 (30.16), H 7.07 (7.37), N 3.64 (3.47).  $^{31}\text{P}\{^1\text{H}\}$ -NMR (25  $^{\circ}\text{C}$ , C<sub>6</sub>D<sub>6</sub>, 121.5 MHz):  $\delta = 256.9$  (d,  $^3J(^{31}\text{P}-^{31}\text{P}) = 116\text{ Hz}$ ) 258.8 (d,  $^3J(^{31}\text{P}-^{31}\text{P}) = 116\text{ Hz}$ ).  $^{29}\text{Si}$ -NMR (25  $^{\circ}\text{C}$ , C<sub>6</sub>D<sub>6</sub>, 99.4 MHz):  $\delta = -30.7$  (m, Si(Si(CH<sub>3</sub>)<sub>3</sub>)<sub>3</sub>),  $-13.1$  (m,  $^3J(^{29}\text{Si}-^{31}\text{P}) = 1,2\text{ Hz}$ , Si(Si(CH<sub>3</sub>)<sub>3</sub>)<sub>3</sub>).  $^1\text{H}$ -NMR (25  $^{\circ}\text{C}$ , C<sub>6</sub>D<sub>6</sub>, 500.13 MHz):  $\delta = 0.31$  (s, 54 H, Si(Si(CH<sub>3</sub>)<sub>3</sub>)<sub>3</sub>).  $^{13}\text{C}\{^1\text{H}\}$ -NMR (25  $^{\circ}\text{C}$ , C<sub>6</sub>D<sub>6</sub>, 125.8 MHz): 1.09 (s, Si(Si(CH<sub>3</sub>)<sub>3</sub>)<sub>3</sub>), 119.3 (q,  $^1J(^{13}\text{C}-^{19}\text{F}) = 320.7\text{ Hz}$ , CF<sub>3</sub>).  $^{19}\text{F}$ -NMR (25  $^{\circ}\text{C}$ , C<sub>6</sub>D<sub>6</sub>, 282.4 MHz):  $-76.1$ . IR (ATR, 25  $^{\circ}\text{C}$ , 32 scans,  $\text{cm}^{-1}$ ): = 2950 (m), 2895 (w) 1383 (m), 1311 (w), 1245 (s), 1199 (s), 1143 (m), 1022 (w), 975 (m), 936 (w), 904 (m), 818 (vs), 747 (s), 689 (s). Raman (200 mW, 25  $^{\circ}\text{C}$ , 112 scans,  $\text{cm}^{-1}$ ): = 3490 (1), 2953 (5), 2895 (10), 690 (1), 629 (3), 169 (2). MS (FAB<sup>+</sup>, Cs, 20keV, *p*-NBA matrix): 73 [Si(CH<sub>3</sub>)<sub>3</sub>]<sup>+</sup>, 292 [PN-Si(Si(CH<sub>3</sub>)<sub>3</sub>)<sub>3</sub>]<sup>+</sup>, 621 [M-OTf+2H]<sup>+</sup>, 736 [M-Cl+3H]<sup>+</sup>. Crystals suitable for X-ray crystallographic analysis were obtained, by cooling a saturated dichloromethane solution of **6** to  $-40\text{ }^{\circ}\text{C}$ .

## Synthesis of 2-chloro-3,4-bis-tris(trimethylsilyl)silyl-cyclo-diphosphadiazenium-tetrachloridogallate (7)

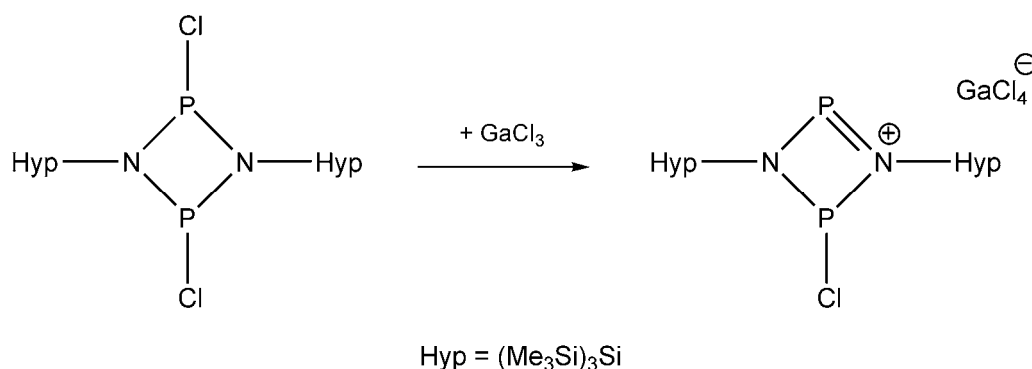

To a stirred solution of 1,3-dichloro-2,4-bis-tris(trimethylsilyl)silyl-cyclo-diphosphadiazenane (**5**) (0.656 g, 1.0 mmol) in CH<sub>2</sub>Cl<sub>2</sub> (5 mL), GaCl<sub>3</sub> (0.176 g, 1.0 mmol) in CH<sub>2</sub>Cl<sub>2</sub> (5 mL), was added dropwise at -78 °C over a period of 5 minutes. The resulting dark red solution is warmed to -30 °C. Removal of solvent *in vacuo* at -30 °C yields 0.810 g (0.97 mmol, 97%) **7** as a microcrystalline solid.

Mp 54 °C; 151 °C (dec.). Anal. calc. % (found): C 25.98 (26.57), H 6.54 (6.27), N 3.37 (2.99). <sup>31</sup>P{<sup>1</sup>H}-NMR (25 °C, C<sub>6</sub>D<sub>6</sub>, 161.9 MHz): δ = 238.1 (d, <sup>3</sup>J(<sup>31</sup>P-<sup>31</sup>P) = 68Hz, N-P-Cl), 405.4 (d, <sup>3</sup>J(<sup>31</sup>P-<sup>31</sup>P) = 68Hz, N<sup>+</sup>=P). <sup>29</sup>Si-NMR (25 °C, C<sub>6</sub>D<sub>6</sub>, 99.4 MHz): δ = -20.2 (m, Si(Si(CH<sub>3</sub>)<sub>3</sub>)<sub>3</sub>), -12.1 (m, <sup>3</sup>J(<sup>29</sup>Si-<sup>31</sup>P) = 1.3 Hz, Si(Si(CH<sub>3</sub>)<sub>3</sub>)<sub>3</sub>). <sup>1</sup>H-NMR (25 °C, C<sub>6</sub>D<sub>6</sub>, 500.13 MHz): δ = 0.33 (s, 54 H, Si(Si(CH<sub>3</sub>)<sub>3</sub>)<sub>3</sub>). <sup>13</sup>C{<sup>1</sup>H}-NMR (25 °C, C<sub>6</sub>D<sub>6</sub>, 125.8 MHz): δ = 0.51 (s, Si(Si(CH<sub>3</sub>)<sub>3</sub>)<sub>3</sub>). IR (ATR, 25 °C, 32 scans, cm<sup>-1</sup>): = 2950 (m), 2894 (w), 1400 (w), 1312 (w), 1246 (m), 1151 (m), 1090 (w), 1026 (w), 979 (m), 826 (vs), 744 (m), 689 (m), 621 (m), 534 (w). MS (EI, 70eV, M = [Si(Si(CH<sub>3</sub>)<sub>3</sub>)<sub>3</sub>]<sub>2</sub>N<sub>2</sub>P<sub>2</sub>Cl<sup>+</sup>); *m/z* (%): 45(14), 73(100) [Si(CH<sub>3</sub>)<sub>3</sub>]<sup>+</sup>, 74(18), 93(13), 100(39), 130(65), 131(50), 147(20), 159(18), 173(21), 174(43), 188(15), 204(70), 205(17), 245(41) [Si(Si(CH<sub>3</sub>)<sub>3</sub>)<sub>3</sub>-2H], 261(19), 275(28), 292(28) [PN-Si(Si(CH<sub>3</sub>)<sub>3</sub>)<sub>3</sub>], 295(41), 297(18), 319(16), 459(41), 460(15), 461(23), 563(15), 581(17) [M-Si(CH<sub>3</sub>)<sub>3</sub>+Cl]<sup>+</sup>, 583(17), 621(17) [M+2H]<sup>+</sup>.

Crystals suitable for X-ray crystallographic analysis were obtained, by cooling a saturated dichloromethane solution of **7** to -80 °C.



## Literature

- [1] C. B. Fischer, S. Xu, H. Zipse, *Chem. Eur. J.* **2006**, *12*, 5779 – 5784.
- [2] M. Westerhausen, W. Schwarz, *Z. anorg. Allg. Chem.* **1993**, *619*, 1053 – 1063.
- [3] Sheldrick, G. M.: SHELXS-97: Program for the Solution of Crystal Structures, University of Göttingen, Germany 1997.
- [4] Sheldrick, G. M.: SHELXL-97: Program for the Refinement of Crystal Structures, University of Göttingen, Germany 1997.
- [5] Sheldrick, G. M.: SADABS. Version 2. University of Göttingen, Germany 2004.
